# Supplementary material for: Tetraspanin Is Required for Generation of Reactive Oxygen Species by the Dual Oxidase System in Caenorhabditis elegans
Source: PLOS journal article supplement (doi:10.1371/journal.pgen.1002957), 2012-09-20
Supplement: S8 (10.1371/journal.pgen.1002957.s008) [file journal.pgen.1002957.s008]

**Table S2. Isolation of mutants similar to *tsp-15(sv15)*.**

| <b>allele</b> | <b>CG</b> | <b>sequence</b> | <b>gene</b>   | <b>mutation</b>   |
|---------------|-----------|-----------------|---------------|-------------------|
| <i>im10</i>   | 1         | F56C11.1        | <i>bli-3</i>  | missense (P1311L) |
| <i>im11</i>   | 2         |                 |               |                   |
| <i>im12</i>   | 2         |                 |               |                   |
| <i>im13</i>   | 1         |                 |               |                   |
| <i>im14</i>   | 2         |                 |               |                   |
| <i>im16</i>   | 2         |                 |               |                   |
| <i>im20</i>   | 1         |                 |               |                   |
| <i>im21</i>   | 3         | C06E1.3         | <i>doxa-1</i> | splice error      |
| <i>im26</i>   | 1         |                 |               |                   |
| <i>im27</i>   | 2         |                 |               |                   |
| <i>im32</i>   | 3         | C06E1.3         | <i>doxa-1</i> | splice error      |
| <i>im38</i>   | 4         | ZK480.3         | <i>mlt-7</i>  | missense (F375S)  |
| <i>im39</i>   | 4         | ZK480.3         | <i>mlt-7</i>  | missense (I343S)  |

CG, complementation group.
